# Supplementary material
Source: publisher figshare collection journal article supplement (https://acs.figshare.com/ndownloader/files/15860609)
Supplement: Supplementary file 1 [file 15860609]

# Supporting Information

## Augmenting n-type Performance of ambipolar Top-Contact Organic Thin-film Transistors by Self-generated Interlayers

Tanmoy Sarkar<sup>†</sup>, Jane Vinokur<sup>†</sup>, Basel Shamieh<sup>†</sup>, Victoria Savikhin<sup>#‡</sup>, Michael F. Toney<sup>#</sup> and Gitti L. Frey<sup>\*†</sup>

<sup>†</sup>Department of Materials Science and Engineering, Technion—Israel Institute of Technology, Haifa 32000, Israel

<sup>#</sup>SLAC National Accelerator Laboratory, 2575 Sand Hill Road, Building 137, Menlo Park, California 94025, United States

<sup>‡</sup>Electrical Engineering Department, Stanford University, 350 Serra Mall, Stanford, CA 94305, United States

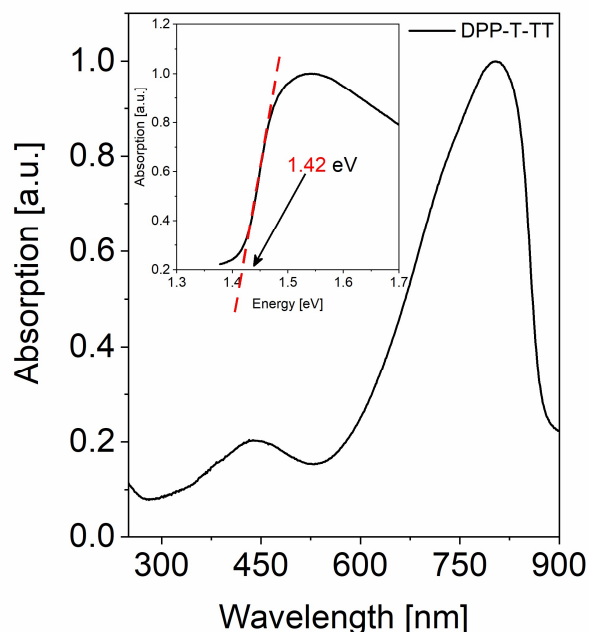

**Figure S1:** Absorption spectrum of a pristine DPP-T-TT film on quartz. Inset shows the onset of the absorption spectrum and corresponding extrapolation for band-gap value extraction. (Measurement performed using a Varian Cary 100 scan UV–vis spectrophotometer).

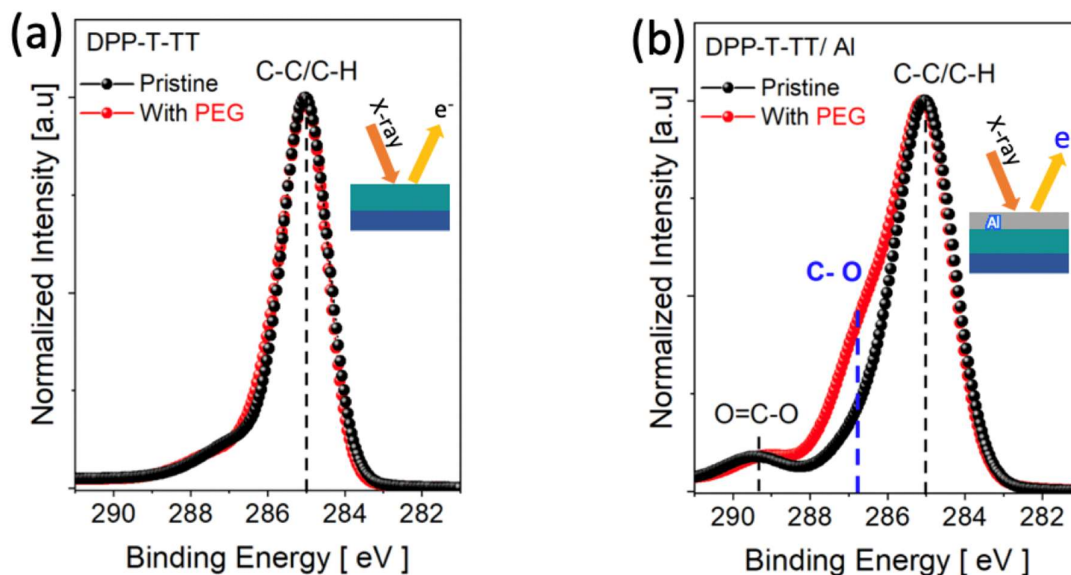

**Figure S2:** For the XPS measurements, we prepared two sets of DPP-T-TT polymer films: pristine and with PEG additive. Both films were partly covered with 3-4 nm Al layer and XPS measurements were performed on a bare region (not covered by Al) and an Al-covered region of each film, as schematically shown in the insets. Figure S2a shows the XPS spectra of the bare regions of pristine DPP-T-TT (black circles) and DPP-T-TT:PEG (red circles) films. Both spectra are identical and show a main C1s peak at 285 eV, characteristic of the C- C/C-H bonds of the polymer. There is no evidence of the PEG characteristic C-O bond expected at 286.45 eV, at the polymer/air interface.<sup>1</sup> Figure S2b shows the XPS spectra of the Al covered regions of pristine DPP-T-TT (black circles) and DPP-T-TT:PEG (red circles) films. The spectrum of the Al-coated pristine DPP-T-TT (black circles) is similar to that of the bare regions with a weak contribution at around 287.4 eV associated with minor O-C=O contaminations. In contrast, the XPS spectrum of the Al-coated region of DPP-T-TT:PEG (red circles) shows a noticeable contribution at 286.6 eV associated with the C-O characteristics peak of PEG. The C-O fingerprint of PEG molecule exclusively present at the Al/polymer interface unambiguously confirm migration of PEG molecules to the Al/polymer interface and the self-generation of a PEG interlayer at the organic/Al interface.

**Equation- S1:** The saturation mobility ( $\mu_{sat}$ ) is calculated using the following equation: <sup>2</sup>

$$\mu_{Sat} = \frac{2L \left( \frac{\sqrt{I_{Drain}}}{V_{Gate} - V_{Th}} \right)^2}{WC}$$

Where, W, L, and C are the transistor channel width, channel length, and capacitance of the gate insulator per unit area, respectively.  $I_{Drain}$ ,  $V_{Gate}$ , and  $V_{Th}$  are the measured drain-to-source current, gate-to-source voltage, and threshold voltage measured from the transfer characteristics, respectively.

**Equation- S2:** Field-effect mobility ( $\mu_{eff}$ ): Obtained by the transconductance ( $g_m$ ) with  $V_{Drain}$ :<sup>3</sup>

$$\mu_{eff} = \frac{g_m}{C \frac{W}{L} V_{Drain}}$$

**Equation- S3:** Change in electron density estimated by parallel capacitance model leads to derivation of the relationship:<sup>4</sup>

$$\Delta n_e = C \Delta V_{Th} / e$$

Where,  $\Delta V_{Th}$  is the threshold voltage difference of the devices and e is the elementary charge.

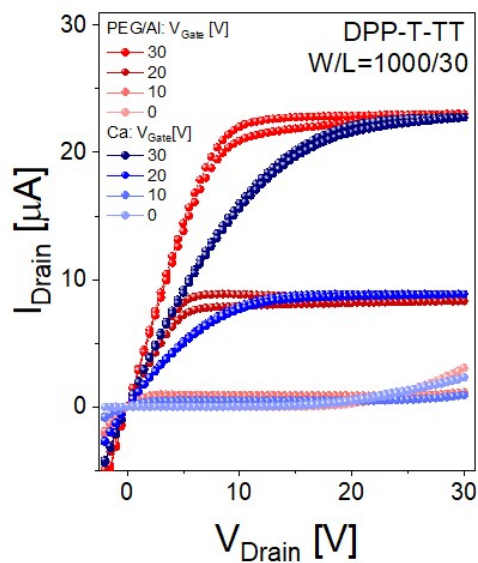

**Figure S3.** Output characteristics comparison of Ca/Al device and PEG/Al devices.

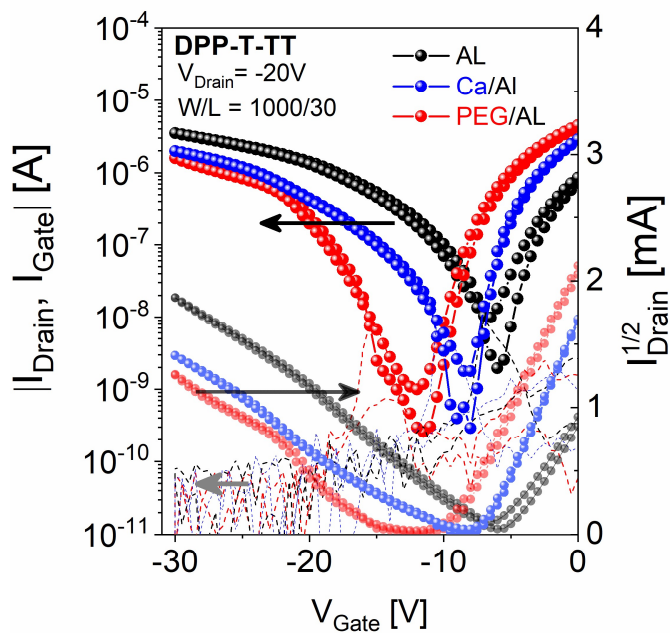

**Figure S4:** p-type Transfer characteristics of the DPP-T-TT OFETs on Si-SiO<sub>2</sub> substrate with Al contacts with (red circles) and without (black circles) PEG at  $V_{\text{Drain}} = -20\text{V}$  for  $W/L=1000/30$ . The dashed lines show the corresponding gate currents of each of the devices.

**Table T1:** Summary of n-channel characteristics of the transistors fabricated in this study:

| <b>DPP-T-TT</b> | Mobility<br>[ $\text{cm}^2 \text{V}^{-1} \text{s}^{-1}$ ] | $V_{\text{Th}}$<br>[V] | $V_{\text{ON}}$<br>[V] | $R_{\text{c.W}}$<br>[ $\text{K}\Omega.\text{cm}$ ] | $R_{\text{channel.W}}$<br>[ $\text{K}\Omega.\text{cm}$ ] |
|-----------------|-----------------------------------------------------------|------------------------|------------------------|----------------------------------------------------|----------------------------------------------------------|
| Pristine        | $0.03 \pm 0.015$                                          | 16.1                   | $11 \pm 1$             | $209 \pm 50$                                       | 2.03                                                     |
| With PEG        | $0.22 \pm 0.04$                                           | 10                     | $5 \pm 0.5$            | $51 \pm 10$                                        | 1.31                                                     |
| With Ca         | $0.16 \pm 0.02$                                           | 8.8                    | $8 \pm 1$              | $86 \pm 21$                                        | $1.30 \pm 0.5$                                           |

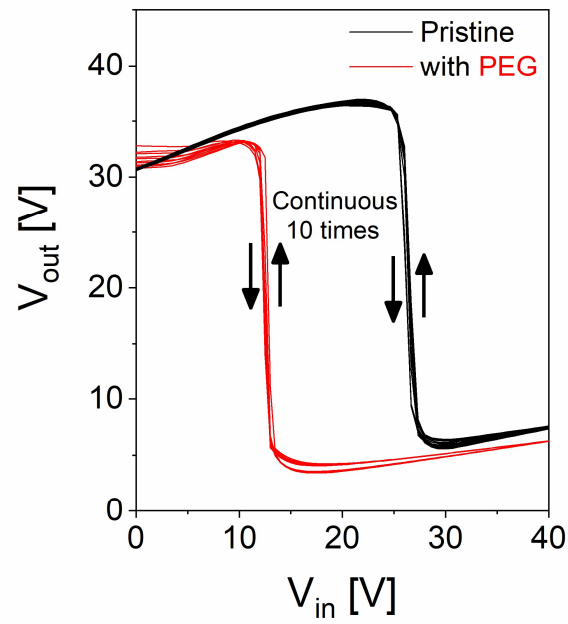

**Figure S5:** Stability characterization by 10-continuous voltage-transfer scans of inverter devices based on two identical OFETs, with PEG (red lines) and without PEG (black lines).

**Table T2:** Calculated values extracted from the GIWAXS analysis:

|                            | Alkyl Q                 | d-spacing [Å] | (100) Alkyl peak area ( $\times 10^3$ ) | (200) Alkyl peak area ( $\times 10^3$ ) | Amorphous peak area OOP ( $\times 10^3$ ) | Amorphous peak area IP ( $\times 10^3$ ) | Alkyl peak FWHM ( $\text{\AA}^{-1}$ ) |
|----------------------------|-------------------------|---------------|-----------------------------------------|-----------------------------------------|-------------------------------------------|------------------------------------------|---------------------------------------|
| <b>DPPT-TT: PEG bulk</b>   | 0.315, 0.62             | 19.95         | 2.8                                     | 0.195                                   | 4                                         | 3.55                                     | 0.049                                 |
| <b>DPPT-TT bulk</b>        | 0.315, 0.62             | 19.95         | 3.5                                     | 0.233                                   | 4.2                                       | 3.72                                     | 0.043                                 |
| <b>DPPT-TT:PEG surface</b> | 0.32, 0.625, 0.93, 1.25 | 19.63         | 16                                      | 1.37                                    | -                                         | -                                        | 0.048                                 |
| <b>DPPT-TT surface</b>     | 0.315, 0.615            | 19.95         | 4.7                                     | 0.56                                    | -                                         | -                                        | 0.047                                 |

## REFERENCES

1. Shamieh, B.; Obuchovsky, S.; Frey, G. L., Spontaneous generation of interlayers in OPVs with silver cathodes: enhancing Voc and lifetime. *Journal of Materials Chemistry C* **2016**, 4, (9), 1821-1828.
2. Sarkar, T.; Shamieh, B.; Verbeek, R.; Kronemeijer, A. J.; Gelinck, G. H.; Frey, G. L., Tuning Contact Resistance in Top-Contact p-Type and n-Type Organic Field Effect Transistors by Self-Generated Interlayers. *Advanced Functional Materials* **2019**, 0, (0), 1805617.
3. Fortunato, E.; Barquinha, P.; Martins, R., Oxide Semiconductor Thin-Film Transistors: A Review of Recent Advances. *Advanced Materials* **2012**, 24, (22), 2945-2986.
4. Roh, J.; Lee, T.; Kang, C.-m.; Kwak, J.; Lang, P.; Horowitz, G.; Kim, H.; Lee, C., Injection-modulated polarity conversion by charge carrier density control via a self-assembled monolayer for all-solution-processed organic field-effect transistors. *Scientific Reports* **2017**, 7, 46365.
